# Supplementary material for: Uncertainties in Predicting Species Distributions under Climate Change: A Case Study Using Tetranychus evansi (Acari: Tetranychidae), a Widespread Agricultural Pest
Source: PubMed Central journal article supplement (PMC3684581; doi:10.1371/journal.pone.0066445), 2013-06-17

**Figure S3:** Model predictions using different prevalence levels under current climate conditions. Notice that the model outputs are biased in the same direction than the input prevalence, with a prevalence of 10% producing a smaller potential range than higher prevalence levels.

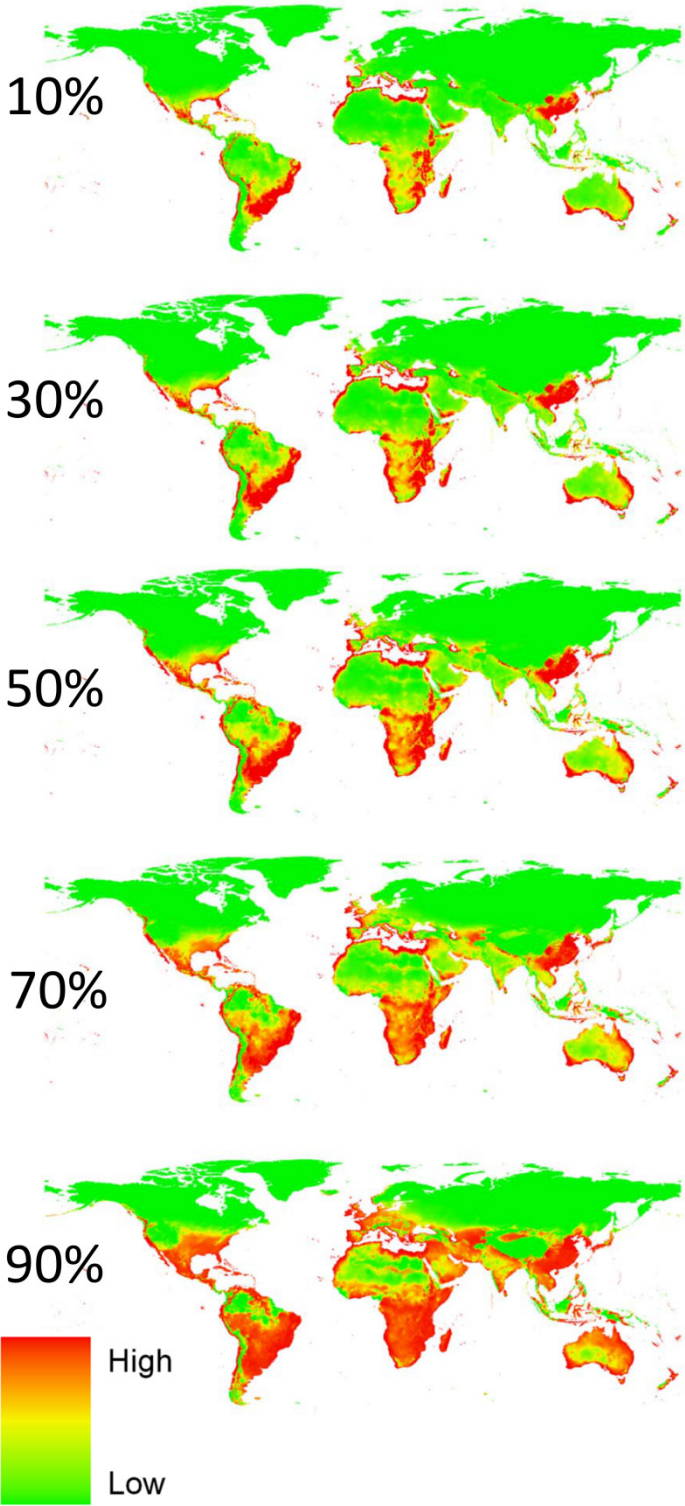

Supplement: pone.0066445.s003.pdf [file pone.0066445.s003.pdf]
