# Supplementary material for: Uncertainties in Predicting Species Distributions under Climate Change: A Case Study Using Tetranychus evansi (Acari: Tetranychidae), a Widespread Agricultural Pest
Source: PubMed Central journal article supplement (PMC3684581; doi:10.1371/journal.pone.0066445), 2013-06-17
Supplement: pone.0066445.s006.pdf [file pone.0066445.s006.pdf]

**Table S1:** Environmental mean and standard deviation of environmental conditions in sites occupied by each clade (only variables used in the modelling process are shown). Notice that since values were extracted from Worldclim ([www.worldclim.org](http://www.worldclim.org)), temperature values correspond to real temperature in Celsius x 100.

| <b>Variable</b>                           | <b>Clade 1</b>    | <b>Clade 2</b>     |
|-------------------------------------------|-------------------|--------------------|
| Mean altitude (m)                         | 569.264 ± 594.778 | 223.438 ± 239.587  |
| Annual Mean Temperature (°C x 100)        | 193.295 ± 30.076  | 205.507 ± 45.856   |
| Mean Diurnal Temperature Range (°C x 100) | 110.545 ± 28.715  | 92.288 ± 19.451    |
| Temperature Annual Range (°C x 100)       | 219.125 ± 50.225  | 175.096 ± 60.795   |
| Annual Precipitation (mm)                 | 927.427 ± 549.630 | 1010.808 ± 422.098 |
| Precipitation Seasonality                 | 68.083 ± 28.056   | 59.616 ± 25.026    |
| Precipitation of Driest Quarter (mm)      | 78.326 ± 91.870   | 91.904 ± 77.307    |
| Precipitation of Coldest Quarter (mm)     | 134.830 ± 114.032 | 271.644 ± 209.725  |
